# Supplementary material for: Scalable production of reduced graphene oxide via biowaste valorisation: an efficient oxygen reduction reaction towards metal-free electrocatalysis
Source: Royal Society of Chemistry journal article supplement (doi:10.1039/d2nj05082j), 2022-11-29
Supplement: d2nj05082j1.pdf [file d2nj05082j1.pdf]

**Electronic Supplementary Information (ESI) for-**

**Scalable production of reduced graphene oxide via biowaste valorisation:  
An efficient oxygen reduction reaction towards metal-free electrocatalysis**

Asmita Shah<sup>\*a</sup>, Harish Singh<sup>b</sup>, Pongthep Prajongtat<sup>c</sup>, Manish Chandra Joshi<sup>d</sup>, Supa Hannongbua<sup>e</sup>, Nattaporn Chattham<sup>f</sup>, Young-Ki Kim<sup>\*g</sup>, Sandeep Kumar<sup>h,i\*</sup>, and Dharmendra Pratap Singh<sup>\*a</sup>

<sup>a</sup> Université du Littoral Côte d'Opale, UR 4476, UDSMM, Unité de Dynamique et Structure des Matériaux Moléculaires, F-62228 Calais France

<sup>b</sup> Institute of Nano Science and Technology, Phase 10, Sector 64, Punjab-160062, India

<sup>c</sup> Department of Materials Science, Faculty of Science, Kasetsart University, Thailand

<sup>d</sup> Department of Electronics and Communication, University College of Engineering, Kota-324010, Rajasthan, India

<sup>e</sup> Department of Chemistry, Faculty of Science, Kasetsart University, Thailand

<sup>f</sup> Department of Physics, Faculty of Science, Kasetsart University, Thailand

<sup>g</sup> Department of Chemical Engineering, Pohang University of Science and Technology (POSTECH), Pohang 37673, Republic of Korea

<sup>h</sup> Raman Research Institute, C.V. Raman Avenue, Sadashivanagar, Bangaluru, Karnataka 560080, India.

<sup>i</sup> Department of Chemistry, Nitte Meenakshi Institute of Technology, Yelahanka, Bangalore 560064, India.

\*Corresponding author: E-mail: [skumar@rri.res.in](mailto:skumar@rri.res.in); [asmita.shah@etu.univ-littoral.fr](mailto:asmita.shah@etu.univ-littoral.fr), [dharmendra.singh@univ-littoral.fr](mailto:dharmendra.singh@univ-littoral.fr), [ykkim@postech.ac.kr](mailto:ykkim@postech.ac.kr)

**Table of Contents**

|                                           |   |
|-------------------------------------------|---|
| Results of Linear Sweep Voltammetry ..... | 2 |
| Computational study .....                 | 3 |

### 1) Results of Linear Sweep Voltammetry

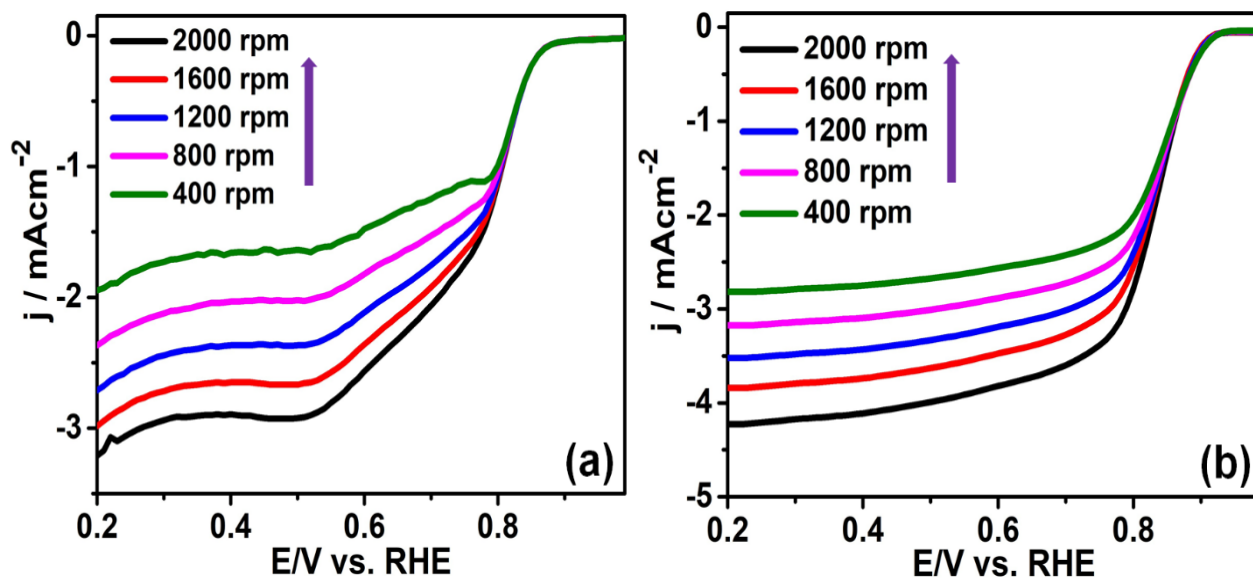

**Fig. S1.** LSV curves of (a) CS-rGO (b) Pt/C catalysts at different rotating speeds from 400 to 2000 rpm.

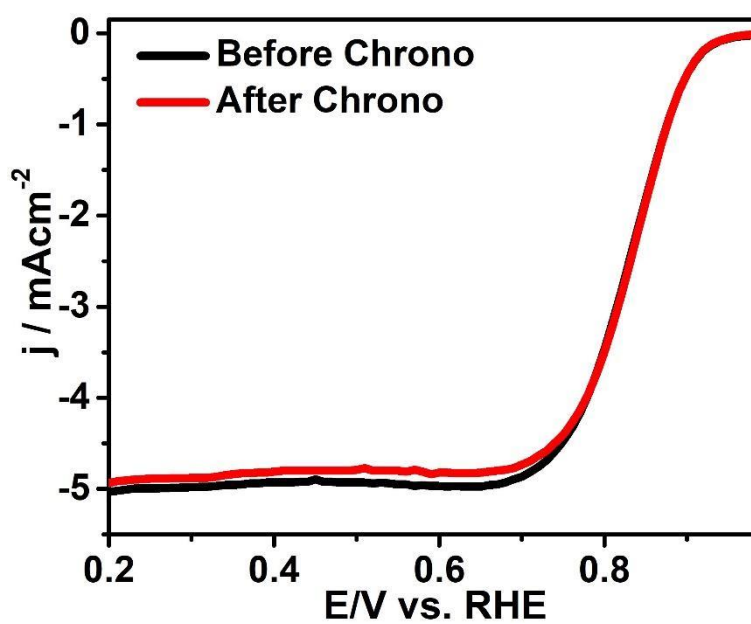

**Fig. S2.** LSV plots (at 2000 rpm) before and after chronoamperometry studies with NCS-rGO.

## 2) Computational study

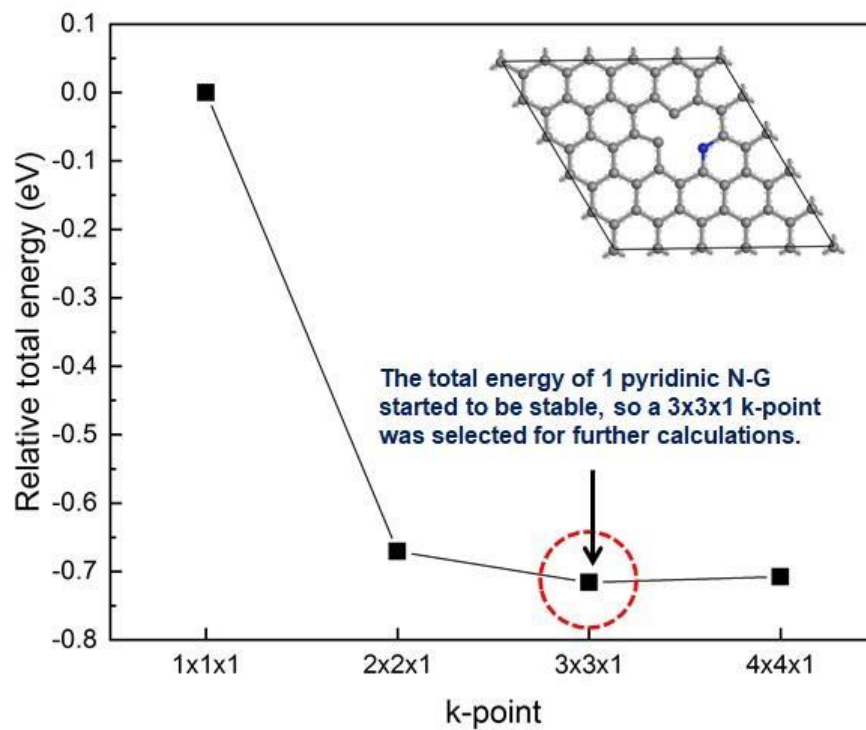

**Fig. S3.** Relative total energy of 1pyridinic N-G calculated by the PBE/DNP method at different k-points.

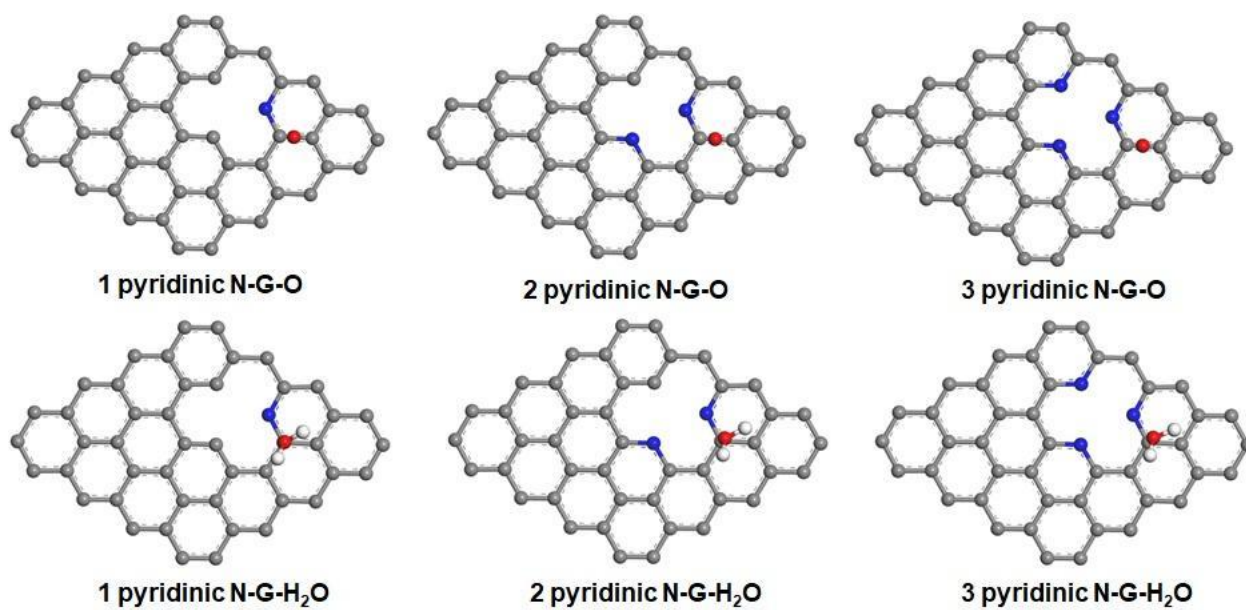

**Fig. S4.** Optimized geometries of the adsorption complexes composed of Q pyridinic N-G (Q = 1–3) and O or H<sub>2</sub>O.
